# Supplementary material
Source: ML conference proceedings conference paper supplement (https://openreview.net/forum?id=WUpzZyyTvKu)
Supplement: supplementary_material [file attachment]

# The Fewer the Merrier: Pruning Preferred Operators with Novelty

Supplemental material

## **Bounding subset size**

We provide here the domain-wise coverage results comparing various configurations that bound the preferred operators subset size. These results elaborate on the results presented in Table 2 of the main submission. Rows where all compared configurations exhibit the same behavior are omitted. The column names are as follows. T stands for a selection of the top operators based on the novelty score. R stands for random selection. The rest of the notation is as in the main submission.

# Small bound, $k = 10$

| Coverage                | All                         |           | $\mathcal{PO}_{-3}$ |           | $\mathcal{PO}_{-2}$ |             | $\mathcal{PO}_{-1}$ |             | $\mathcal{PO}_0$ |               | $\mathcal{PO}_1$ |           | $\mathcal{PO}_2$ |           | $\mathcal{PO}_3$ |             | $\mathcal{PO}_{\max}$ |
|-------------------------|-----------------------------|-----------|---------------------|-----------|---------------------|-------------|---------------------|-------------|------------------|---------------|------------------|-----------|------------------|-----------|------------------|-------------|-----------------------|
|                         | $h_{\text{OB}}^{\text{FF}}$ | R         | T                   | R         | T                   | R           | T                   | R           | T                | R             | T                | R         | T                | R         | T                | R           | R                     |
| agricola18 (20)         | <b>12</b>                   | <b>12</b> | 11                  | 11        | <b>12</b>           | <b>12</b>   | 10                  | 10          | 10               | 10            | <b>12</b>        | 11.8      | <b>12</b>        | <b>12</b> | <b>12</b>        | <b>12</b>   | <b>12</b>             |
| airport (50)            | 44                          | 46        | 46                  | 46        | 46                  | 46          | 47                  | <b>48</b>   | <b>48</b>        | 47            | 46               | 46        | 47               | 46        | <b>48</b>        | 47          | 45                    |
| barman14 (20)           | 19                          | 19        | <b>20</b>           | <b>20</b> | <b>20</b>           | <b>20</b>   | <b>20</b>           | <b>20</b>   | <b>20</b>        | <b>20</b>     | <b>20</b>        | <b>20</b> | <b>20</b>        | <b>20</b> | <b>20</b>        | <b>20</b>   | <b>20</b>             |
| childsnack14 (20)       | 1                           | 1         | 1                   | 1         | 3                   | 3           | 3                   | 3           | 0                | 0             | <b>4</b>         | <b>4</b>  | 3                | 3         | 3                | 3           | 2                     |
| data-network18 (20)     | 14                          | 13        | 16                  | 14        | 13                  | 14.4        | 17                  | 13.2        | <b>19</b>        | 15            | 18               | 17        | 16               | 17        | 16               | 17          | 16                    |
| depot (22)              | 19                          | 20        | 21                  | 21        | 21                  | 21.6        | 20                  | 21          | <b>22</b>        | 21            | <b>22</b>        | <b>22</b> | 21               | 21        | 21               | 20          | <b>22</b>             |
| floortile11 (20)        | 7                           | 7         | 7                   | 7         | 7                   | 7           | <b>8</b>            | <b>8</b>    | <b>8</b>         | <b>8</b>      | 7                | 7         | 6                | 6         | 6                | 6           | 7                     |
| floortile14 (20)        | 2                           | <b>3</b>  | <b>3</b>            | <b>3</b>  | 2                   | 2           | <b>3</b>            | <b>3</b>    | <b>3</b>         | <b>3</b>      | 2                | 2         | 2                | 2         | 2                | 2           | 2                     |
| hiking14 (20)           | <b>20</b>                   | 19        | <b>20</b>           | 19        | <b>20</b>           | <b>20</b>   | <b>20</b>           | <b>20</b>   | <b>20</b>        | <b>20</b>     | <b>20</b>        | <b>20</b> | <b>20</b>        | <b>20</b> | <b>20</b>        | <b>20</b>   | <b>20</b>             |
| logistics98 (35)        | 33                          | 31.6      | 33                  | 31.8      | 31                  | 31.8        | 33                  | 33          | 33               | 33            | <b>34</b>        | <b>34</b> | <b>34</b>        | <b>34</b> | <b>34</b>        | <b>34</b>   | <b>34</b>             |
| nomystery11 (20)        | <b>18</b>                   | <b>18</b> | <b>18</b>           | <b>18</b> | 17                  | 17          | 16                  | 16          | 15               | 15            | 17               | 17        | 17               | 17        | 17               | 17          | 15                    |
| openstacks (30)         | <b>30</b>                   | <b>30</b> | <b>30</b>           | <b>30</b> | <b>30</b>           | <b>30</b>   | <b>30</b>           | <b>30</b>   | <b>30</b>        | <b>30</b>     | <b>30</b>        | <b>30</b> | <b>30</b>        | 29        | <b>30</b>        | 28          | <b>30</b>             |
| organic-synth-sp18 (20) | 12                          | 11.2      | 13                  | 12.6      | <b>14</b>           | <b>14</b>   | 12                  | 12.8        | 12               | 12.6          | <b>14</b>        | 12.6      | 13               | 12.6      | 13               | 12.8        | 12                    |
| parking14 (20)          | 9                           | 8.8       | 8                   | 9.2       | 9                   | 9.2         | 8                   | 9.2         | 9                | 10.0          | 8                | 10.2      | 10               | 8.8       | 10               | 9.8         | <b>11.8</b>           |
| pathways (30)           | 29                          | <b>30</b> | 27                  | 27        | 27                  | 28          | 27                  | 27          | 26               | 28            | 24               | 25        | 28               | 26        | 26               | 27          | 28                    |
| pipes-notankage (50)    | 43                          | 43        | 43                  | 43        | 44                  | 44          | 44                  | 44          | 46               | 46            | <b>47</b>        | <b>47</b> | 46               | 46        | 45               | 45          | 44                    |
| pipes-tankage (50)      | 43                          | 43        | 42                  | 42        | 44                  | 44          | <b>46</b>           | <b>46</b>   | 45               | 45.2          | 45               | 45        | <b>46</b>        | <b>46</b> | <b>46</b>        | <b>46</b>   | 44                    |
| satellite (36)          | 29                          | 30.2      | 28                  | 30.6      | 28                  | 31          | 28                  | 31          | 27               | 32            | 27               | 30        | 27               | 30        | 28               | 30.2        | <b>32.4</b>           |
| scanalyzer08 (30)       | 29                          | 29        | <b>30</b>           | <b>30</b> | <b>30</b>           | <b>30</b>   | <b>30</b>           | <b>30</b>   | 29               | 29.6          | <b>30</b>        | 29.2      | 28               | 28        | 29               | 28.2        | <b>30</b>             |
| scanalyzer11 (20)       | 19                          | 19        | <b>20</b>           | <b>20</b> | <b>20</b>           | <b>20</b>   | <b>20</b>           | <b>20</b>   | <b>20</b>        | 19.8          | 19               | 19.2      | 18               | 18.2      | 18               | 18.4        | <b>20</b>             |
| snake18 (20)            | 6                           | 6         | 6                   | 6         | 6                   | 6.2         | 6                   | 6.4         | 8                | 8.2           | 8                | 7.6       | <b>9</b>         | 8.6       | 7                | 7.2         | 7                     |
| spider18 (20)           | 16                          | 16.8      | 19                  | 19        | 19                  | <b>19.4</b> | 19                  | <b>19.4</b> | 19               | 19            | 18               | 18        | 18               | 18        | 16               | 17          | 17                    |
| storage (30)            | 26                          | 29        | 28                  | 28        | 27                  | 28          | 29                  | 28          | 28               | 28            | <b>30</b>        | 29        | 28               | 28        | 29               | 28          | 28                    |
| termes18 (20)           | 13                          | 13.2      | <b>16</b>           | <b>16</b> | <b>16</b>           | <b>16</b>   | <b>16</b>           | <b>16</b>   | 14               | 14.4          | 15               | 15        | <b>16</b>        | <b>16</b> | 15               | 15          | 15.4                  |
| tetris14 (20)           | 15                          | 15.2      | 16                  | 16.6      | 16                  | 15.2        | 15                  | 15.2        | 17               | 17.2          | 17               | 17.2      | 18               | 17.2      | <b>19</b>        | 18.2        | 17                    |
| thoughtful14 (20)       | <b>19</b>                   | <b>19</b> | 18                  | 18        | 17                  | 17          | 18                  | 18          | 17               | 17            | 16               | 16        | 17               | 17        | 17               | 17          | 18                    |
| tidybot11 (20)          | 17                          | 17        | 17                  | 17        | 17                  | 17          | 17                  | 17.2        | <b>18</b>        | <b>18</b>     | 17               | 17        | <b>18</b>        | <b>18</b> | 17               | 17          | <b>18</b>             |
| transport11 (20)        | 14                          | 14.2      | 17                  | 15.4      | 18                  | 16.8        | 19                  | 18.0        | 16               | 17.2          | 17               | 17.2      | 19               | 18.6      | 19               | <b>19.2</b> | 17.6                  |
| transport14 (20)        | 8                           | 6.6       | 8                   | 8.6       | 8                   | 7.4         | 8                   | 10.2        | 9                | <b>13.6</b>   | 10               | 10.0      | 10               | 8.2       | 11               | 10.2        | 8.2                   |
| trucks (30)             | 22                          | 20.6      | <b>24</b>           | 21.4      | <b>24</b>           | 23.0        | <b>24</b>           | 23.6        | 22               | 23.2          | 23               | 22.6      | 20               | 20        | 21               | 22          | 22.4                  |
| visitall14 (20)         | 18                          | 17.8      | 18                  | 18.6      | 18                  | 18.4        | <b>20</b>           | 18.2        | <b>20</b>        | 19.2          | 19               | 18        | 17               | 19.0      | 18               | 18.6        | <b>20</b>             |
| woodworking11 (20)      | 19                          | 19        | 19                  | 19        | 19                  | 19          | <b>20</b>           | 19          | <b>20</b>        | 19            | <b>20</b>        | 19        | <b>20</b>        | 19        | <b>20</b>        | 19          | <b>20</b>             |
| <b>Sum (1816)</b>       | 1598                        | 1601.2    | 1616                | 1612.8    | 1616                | 1621.4      | 1626                | 1627.4      | 1623             | <b>1632.2</b> | 1629             | 1628.6    | 1627             | 1623.2    | 1626             | 1624.8      | 1628.8                |

# Medium bound, $k = 100$

| Coverage                | All                         |           | $\mathcal{PO}_{-3}$ |             | $\mathcal{PO}_{-2}$ |           | $\mathcal{PO}_{-1}$ |           | $\mathcal{PO}_0$ |           | $\mathcal{PO}_1$ |           | $\mathcal{PO}_2$ |           | $\mathcal{PO}_3$ |             | $\mathcal{PO}_{\max}$ |
|-------------------------|-----------------------------|-----------|---------------------|-------------|---------------------|-----------|---------------------|-----------|------------------|-----------|------------------|-----------|------------------|-----------|------------------|-------------|-----------------------|
|                         | $h_{\text{OB}}^{\text{FF}}$ | R         | T                   | R           | T                   | R         | T                   | R         | T                | R         | T                | R         | T                | R         | T                | R           | R                     |
| agricola18 (20)         | <b>12</b>                   | <b>12</b> | 11                  | 11          | <b>12</b>           | <b>12</b> | 10                  | 10        | 11               | 10.2      | <b>12</b>        | <b>12</b> | <b>12</b>        | <b>12</b> | <b>12</b>        | <b>12</b>   | <b>12</b>             |
| airport (50)            | <b>47</b>                   | <b>47</b> | <b>47</b>           | <b>47</b>   | <b>47</b>           | <b>47</b> | <b>47</b>           | <b>47</b> | 46               | 46        | <b>47</b>        | <b>47</b> | <b>47</b>        | <b>47</b> | <b>47</b>        | <b>47</b>   | 45.2                  |
| barman14 (20)           | 19                          | 19        | <b>20</b>           | <b>20</b>   | <b>20</b>           | <b>20</b> | <b>20</b>           | <b>20</b> | <b>20</b>        | <b>20</b> | <b>20</b>        | <b>20</b> | <b>20</b>        | <b>20</b> | <b>20</b>        | <b>20</b>   | <b>20</b>             |
| childsnack14 (20)       | 1                           | 1         | 1                   | 1           | 3                   | 3         | 3                   | 3         | 0                | 0         | <b>4</b>         | <b>4</b>  | 3                | 3         | 3                | 3           | 2                     |
| data-network18 (20)     | 14                          | 13.4      | 14                  | 14          | 14                  | 14        | 16                  | 15.2      | 16               | 16        | <b>17</b>        | 16.8      | <b>17</b>        | <b>17</b> | <b>17</b>        | <b>17</b>   | 15.4                  |
| depot (22)              | 19                          | 19        | 20                  | 20.2        | 21                  | 21        | 21                  | 21        | 21               | 21        | <b>22</b>        | <b>22</b> | 21               | 21        | 21               | 21          | <b>22</b>             |
| floortile11 (20)        | <b>8</b>                    | <b>8</b>  | <b>8</b>            | <b>8</b>    | 7                   | 7         | 7                   | 7         | 7                | 7         | 7                | 7         | 6                | 6         | 6                | 6           | 7                     |
| floortile14 (20)        | <b>3</b>                    | <b>3</b>  | 2                   | 2           | 2                   | 2         | <b>3</b>            | <b>3</b>  | <b>3</b>         | <b>3</b>  | 2                | 2         | 2                | 2         | 2                | 2           | 2                     |
| logistics98 (35)        | 30                          | 30        | 30                  | 30          | 30                  | 30        | 30                  | 30        | 31               | 31        | 32               | 32        | 33               | 33        | 33               | <b>34</b>   | <b>34</b>             |
| nomystery11 (20)        | <b>18</b>                   | <b>18</b> | <b>18</b>           | <b>18</b>   | 17                  | 17        | 16                  | 16        | 15               | 15        | 17               | 17        | 17               | 17        | 17               | 17          | 15                    |
| openstacks14 (20)       | <b>20</b>                   | <b>20</b> | <b>20</b>           | <b>20</b>   | <b>20</b>           | <b>20</b> | <b>20</b>           | <b>20</b> | 19               | <b>20</b> | 18               | 19.2      | 18               | 18.6      | 17               | 19          | <b>20</b>             |
| openstacks (30)         | <b>30</b>                   | <b>30</b> | <b>30</b>           | <b>30</b>   | <b>30</b>           | <b>30</b> | <b>30</b>           | <b>30</b> | <b>30</b>        | <b>30</b> | <b>30</b>        | <b>30</b> | <b>30</b>        | <b>30</b> | 29               | 29          | <b>30</b>             |
| organic-synth-sp18 (20) | 12                          | 12        | <b>14</b>           | <b>14</b>   | <b>14</b>           | <b>14</b> | 13                  | 13.2      | <b>14</b>        | 13.2      | <b>14</b>        | <b>14</b> | 13               | 13        | 13               | 13.4        | 12.4                  |
| parking11 (20)          | <b>20</b>                   | <b>20</b> | <b>20</b>           | <b>20</b>   | <b>20</b>           | <b>20</b> | <b>20</b>           | <b>20</b> | <b>20</b>        | <b>20</b> | <b>20</b>        | <b>20</b> | 19               | <b>20</b> | <b>20</b>        | <b>20</b>   | <b>20</b>             |
| parking14 (20)          | 6                           | 6.6       | 6                   | 6.4         | 7                   | 6.6       | 7                   | 6.8       | 7                | 7.8       | 6                | 7.6       | 8                | 8.4       | 7                | 8.2         | <b>9.2</b>            |
| pathways (30)           | 28                          | 28        | 27                  | 27          | 26                  | 26        | 27                  | 27        | 26               | 26        | 25               | 25        | 26               | 26        | 27               | 27          | <b>30</b>             |
| pipes-notankage (50)    | 43                          | 43        | 43                  | 43          | 44                  | 44        | 44                  | 44.4      | <b>47</b>        | <b>47</b> | <b>47</b>        | <b>47</b> | 45               | 45        | 45               | 45          | 44                    |
| pipes-tankage (50)      | 43                          | 43        | 42                  | 42          | 44                  | 44        | <b>46</b>           | <b>46</b> | 45               | 45.2      | 45               | 45        | <b>46</b>        | 45.2      | <b>46</b>        | <b>46</b>   | 44                    |
| satellite (36)          | 27                          | 28        | 27                  | 28          | 27                  | 28        | 25                  | 26        | 27               | 28        | 28               | <b>29</b> | 28               | 28.6      | 28               | 28.2        | 28.2                  |
| scanalyzer08 (30)       | 29                          | 29        | <b>30</b>           | <b>30</b>   | <b>30</b>           | <b>30</b> | <b>30</b>           | <b>30</b> | <b>30</b>        | 29.8      | 29               | 29.4      | 28               | 28        | 29               | 28.2        | <b>30</b>             |
| scanalyzer11 (20)       | <b>20</b>                   | 19.2      | <b>20</b>           | <b>20</b>   | <b>20</b>           | <b>20</b> | <b>20</b>           | <b>20</b> | <b>20</b>        | <b>20</b> | <b>20</b>        | 19.2      | 19               | 18        | 18               | 18.4        | <b>20</b>             |
| snake18 (20)            | 6                           | 6.0       | 6                   | 6.2         | 6                   | 6.4       | 7                   | 7         | 8                | 7.8       | 8                | 7.2       | <b>9</b>         | 8.4       | 7                | 7           | 7                     |
| spider18 (20)           | 16                          | 16        | 19                  | 19          | 19                  | 19        | <b>20</b>           | 19.4      | 19               | 19        | 18               | 18        | 18               | 18        | 17               | 17          | 17                    |
| storage (30)            | 28                          | 28        | 27                  | 27          | 28                  | 28        | 27                  | 27        | 28               | 28        | 28               | 28        | 27               | 27        | 28               | 28          | <b>30</b>             |
| termes18 (20)           | 14                          | 13.8      | <b>16</b>           | <b>16</b>   | <b>16</b>           | <b>16</b> | <b>16</b>           | <b>16</b> | 14               | 14        | 15               | 15        | <b>16</b>        | <b>16</b> | 15               | 15          | 15.2                  |
| tetris14 (20)           | 15                          | 15.2      | 16                  | 16.4        | 15                  | 15.4      | 16                  | 16.2      | 17               | 17        | 18               | 17        | 17               | 17.2      | 18               | <b>18.6</b> | 17                    |
| thoughtful14 (20)       | <b>19</b>                   | <b>19</b> | 18                  | 18          | 17                  | 17        | 18                  | 18        | 17               | 17        | 16               | 16        | 17               | 17        | 17               | 17          | 18                    |
| tidybot11 (20)          | 17                          | 17        | 17                  | 17          | 17                  | 17        | 17                  | 17        | <b>18</b>        | <b>18</b> | 17               | 17        | <b>18</b>        | <b>18</b> | 17               | 17.2        | <b>18</b>             |
| transport11 (20)        | 14                          | 14.6      | 16                  | 16.6        | 17                  | 18.0      | <b>19</b>           | 18.4      | 17               | 17.2      | 18               | 17.6      | 18               | 18        | <b>19</b>        | <b>19</b>   | 16.2                  |
| transport14 (20)        | 9                           | 9.0       | 8                   | 9.2         | 9                   | 7.8       | 11                  | 9.6       | 12               | 12.4      | <b>13</b>        | 12.8      | 8                | 9.0       | 10               | 10.0        | 9.2                   |
| trucks (30)             | 21                          | 21.2      | 23                  | <b>23.6</b> | 23                  | 22.6      | 23                  | 23        | 22               | 22.0      | 21               | 21.4      | 21               | 20.8      | 20               | 20.2        | 22.8                  |
| visitall14 (20)         | 19                          | 18.2      | 19                  | 18.6        | 18                  | 19.2      | 18                  | 18.4      | <b>20</b>        | 18.8      | 18               | 18.2      | 18               | 18.2      | 18               | 18.2        | <b>20</b>             |
| woodworking11 (20)      | 19                          | 19        | 19                  | 19          | 19                  | 19        | 19                  | 19        | 19               | 19        | 19               | 19        | 19               | 19        | 19               | 19          | <b>20</b>             |
| <b>Sum (1816)</b>       | 1599                        | 1599.2    | 1607                | 1611.2      | 1612                | 1614.0    | 1619                | 1617.6    | 1619             | 1619.4    | 1624             | 1625.4    | 1617             | 1618.4    | 1615             | 1620.6      | <b>1625.8</b>         |

# Large bound, $k = 1000$

| Coverage                | All                         |           | $\mathcal{PO}_{-3}$ |           | $\mathcal{PO}_{-2}$ |             | $\mathcal{PO}_{-1}$ |           | $\mathcal{PO}_0$ |             | $\mathcal{PO}_1$ |             | $\mathcal{PO}_2$ |             | $\mathcal{PO}_3$ |             | $\mathcal{PO}_{\max}$ |
|-------------------------|-----------------------------|-----------|---------------------|-----------|---------------------|-------------|---------------------|-----------|------------------|-------------|------------------|-------------|------------------|-------------|------------------|-------------|-----------------------|
|                         | $h_{\text{OB}}^{\text{FF}}$ | R         | T                   | R         | T                   | R           | T                   | R         | T                | R           | T                | R           | T                | R           | T                | R           | R                     |
| agricola18 (20)         | <b>12</b>                   | <b>12</b> | 11                  | 11        | <b>12</b>           | <b>12</b>   | 10                  | 10        | 10               | 10.2        | <b>12</b>        | <b>12</b>   | <b>12</b>        | <b>12</b>   | <b>12</b>        | <b>12</b>   | <b>12</b>             |
| airport (50)            | <b>47</b>                   | <b>47</b> | <b>47</b>           | <b>47</b> | <b>47</b>           | <b>47</b>   | <b>47</b>           | <b>47</b> | 46               | 46          | <b>47</b>        | <b>47</b>   | <b>47</b>        | <b>47</b>   | <b>47</b>        | <b>47</b>   | 45                    |
| barman14 (20)           | 19                          | 19        | <b>20</b>           | <b>20</b> | <b>20</b>           | <b>20</b>   | <b>20</b>           | <b>20</b> | <b>20</b>        | <b>20</b>   | <b>20</b>        | <b>20</b>   | <b>20</b>        | <b>20</b>   | <b>20</b>        | <b>20</b>   | <b>20</b>             |
| childsnack14 (20)       | 1                           | 1         | 1                   | 1         | 3                   | 3           | 3                   | 3         | 0                | 0           | <b>4</b>         | <b>4</b>    | 3                | 3           | 3                | 3           | 2                     |
| data-network18 (20)     | 14                          | 13.2      | 14                  | 14        | 14                  | 14          | 15                  | 15        | 16               | 16          | 16               | 16.8        | 17               | <b>17.2</b> | 17               | 17          | 15.4                  |
| depot (22)              | 19                          | 19        | 20                  | 20        | 21                  | 21          | 21                  | 21        | 21               | 21          | <b>22</b>        | <b>22</b>   | 21               | 21          | 21               | 21          | <b>22</b>             |
| floortile11 (20)        | <b>8</b>                    | <b>8</b>  | <b>8</b>            | <b>8</b>  | 7                   | 7           | 7                   | 7         | 7                | 7           | 7                | 7           | 6                | 6           | 6                | 6           | 7                     |
| floortile14 (20)        | <b>3</b>                    | <b>3</b>  | 2                   | 2         | 2                   | 2           | <b>3</b>            | <b>3</b>  | <b>3</b>         | <b>3</b>    | 2                | 2           | 2                | 2           | 2                | 2           | 2                     |
| logistics98 (35)        | 30                          | 30        | 30                  | 30        | 30                  | 30          | 30                  | 30        | 31               | 31          | 32               | 32          | 33               | 33          | <b>34</b>        | <b>34</b>   | <b>34</b>             |
| nomystery11 (20)        | <b>18</b>                   | 17.8      | <b>18</b>           | <b>18</b> | 17                  | 17          | 16                  | 16        | 15               | 15          | 17               | 17          | 17               | 17          | 17               | 17          | 15                    |
| openstacks11 (20)       | <b>20</b>                   | <b>20</b> | <b>20</b>           | <b>20</b> | <b>20</b>           | <b>20</b>   | <b>20</b>           | <b>20</b> | <b>20</b>        | <b>20</b>   | <b>20</b>        | 19.8        | 18               | 18          | 18               | 18          | <b>20</b>             |
| openstacks14 (20)       | <b>20</b>                   | <b>20</b> | <b>20</b>           | <b>20</b> | <b>20</b>           | <b>20</b>   | <b>20</b>           | <b>20</b> | <b>20</b>        | <b>20</b>   | 18               | 17.2        | 15               | 14.6        | 14               | 13.8        | <b>20</b>             |
| openstacks (30)         | <b>30</b>                   | <b>30</b> | <b>30</b>           | <b>30</b> | <b>30</b>           | <b>30</b>   | <b>30</b>           | <b>30</b> | <b>30</b>        | <b>30</b>   | <b>30</b>        | <b>30</b>   | <b>30</b>        | <b>30</b>   | 28               | 28          | <b>30</b>             |
| organic-synth-sp18 (20) | 12                          | 12        | <b>14</b>           | 13.8      | <b>14</b>           | <b>14</b>   | 13                  | 13.2      | 13               | 13          | <b>14</b>        | <b>14</b>   | 13               | 13.2        | 13               | 13          | 12.6                  |
| parking14 (20)          | 7                           | 6.8       | 6                   | 6.4       | 6                   | 6.6         | 7                   | 6.6       | 7                | 7.2         | 9                | 7.0         | 9                | 8.8         | 7                | 7.4         | <b>9.6</b>            |
| pathways (30)           | 28                          | 28        | 27                  | 27        | 26                  | 26          | 27                  | 27        | 26               | 26          | 25               | 25          | 26               | 26          | 27               | 27          | <b>30</b>             |
| pipes-notankage (50)    | 43                          | 43        | 43                  | 43        | 44                  | 44          | 44                  | 44.2      | <b>47</b>        | <b>47</b>   | <b>47</b>        | <b>47</b>   | 45               | 45          | 45               | 45          | 44                    |
| pipes-tankage (50)      | 43                          | 43        | 42                  | 42        | 44                  | 44          | <b>46</b>           | <b>46</b> | 45               | 45.2        | 45               | 45.2        | <b>46</b>        | 45.6        | <b>46</b>        | <b>46</b>   | 44                    |
| satellite (36)          | 28                          | 28        | 28                  | 28        | 27                  | 28          | 26                  | 26        | 28               | 28          | <b>29</b>        | 28          | 28               | 28.2        | 28               | 28          | 28                    |
| scanalyzer08 (30)       | 29                          | 29        | <b>30</b>           | 29.8      | <b>30</b>           | <b>30</b>   | <b>30</b>           | <b>30</b> | <b>30</b>        | 29.8        | <b>30</b>        | 29.4        | 28               | 28          | 29               | 28          | <b>30</b>             |
| scanalyzer11 (20)       | 19                          | 19        | <b>20</b>           | <b>20</b> | <b>20</b>           | <b>20</b>   | <b>20</b>           | <b>20</b> | 19               | 19.8        | <b>20</b>        | 19.0        | 19               | 18          | 19               | 18.2        | <b>20</b>             |
| snake18 (20)            | 6                           | 6.2       | 6                   | 6         | 6                   | 6.2         | 7                   | 6.8       | 7                | 8           | 8                | 7.2         | <b>9</b>         | 8.6         | 7                | 7           | 7                     |
| spider18 (20)           | 16                          | 16        | 19                  | 19        | 19                  | <b>19.2</b> | 19                  | 19        | 19               | 19          | 18               | 18          | 18               | 18          | 17               | 17          | 17                    |
| storage (30)            | 28                          | 28        | 27                  | 27        | 28                  | 28          | 27                  | 27        | 28               | 28          | 28               | 28          | 27               | 27          | 28               | 28          | <b>30</b>             |
| termes18 (20)           | 14                          | 13.6      | <b>16</b>           | <b>16</b> | <b>16</b>           | <b>16</b>   | <b>16</b>           | <b>16</b> | 14               | 14          | 15               | 15          | <b>16</b>        | <b>16</b>   | 15               | 15          | 15                    |
| tetris14 (20)           | 16                          | 15.6      | 17                  | 16        | 15                  | 15.8        | 15                  | 15        | 17               | 17.2        | 17               | 17.2        | 17               | 17.2        | 18               | <b>18.4</b> | 17                    |
| thoughtful14 (20)       | <b>19</b>                   | <b>19</b> | 18                  | 18        | 17                  | 17          | 18                  | 18        | 17               | 17          | 16               | 16          | 17               | 17          | 17               | 17          | 18                    |
| tidybot11 (20)          | 17                          | 17        | 17                  | 17        | 17                  | 17          | 17                  | 17        | <b>18</b>        | <b>18</b>   | 17               | 17          | <b>18</b>        | <b>18</b>   | 17               | 17          | <b>18</b>             |
| transport11 (20)        | 13                          | 14        | 17                  | 16.2      | 18                  | 18          | 18                  | 17.4      | 17               | 17.6        | 17               | 17.6        | 18               | 18.6        | <b>19</b>        | <b>19</b>   | 15.6                  |
| transport14 (20)        | 9                           | 9         | 8                   | 9.2       | 8                   | 7           | 11                  | 9.2       | 11               | <b>12.0</b> | 12               | <b>12.0</b> | 8                | 9.4         | 10               | 10.4        | 9.8                   |
| trucks (30)             | 21                          | 21.2      | 23                  | 23.2      | 23                  | 22.6        | 23                  | 22.8      | 22               | 22.6        | 21               | 22.2        | 21               | 20.8        | 20               | 20.6        | <b>23.6</b>           |
| visitall14 (20)         | 19                          | 18.2      | 18                  | 18.2      | 18                  | 19          | 18                  | 18.4      | 19               | 19          | 18               | 17.6        | 18               | 18.8        | 18               | 18.2        | <b>20</b>             |
| woodworking11 (20)      | 19                          | 19        | 19                  | 19        | 19                  | 19          | 19                  | 19        | 19               | 19          | 19               | 19          | 19               | 19          | 19               | 19          | <b>20</b>             |
| <b>Sum (1816)</b>       | 1600                        | 1598.6    | 1609                | 1608.8    | 1611                | 1613.4      | 1616                | 1613.6    | 1615             | 1619.6      | 1625             | 1621.2      | 1614             | 1615.0      | 1611             | 1611.0      | <b>1626.6</b>         |
